# Supplementary material for: Inside out Porphyridium cruentum: Beyond the Conventional Biorefinery Concept
Source: PubMed Central journal article supplement (PMC9832536; doi:10.1021/acssuschemeng.2c05869), 2022-11-29
Supplement: sc2c05869_si_001.pdf [file sc2c05869_si_001.pdf]

## **Inside out *Porphyridium cruentum*: beyond the conventional biorefinery concept**

Davide Liberti<sup>a</sup>, Paola Imbimbo<sup>a</sup>, Enrica Giustino<sup>a</sup>, Luigi D'Elia<sup>a</sup>, Giarita Ferraro<sup>a</sup>, Angela Casillo<sup>a</sup>, Anna Illiano<sup>a</sup>, Gabriella Pinto<sup>a</sup>, Maria Chiara Di Meo<sup>b</sup>, Gerardo Alvarez-Rivera<sup>c</sup>, Maria Michela Corsaro<sup>a</sup>, Angela Amoresano<sup>a</sup>, Armando Zarrelli<sup>a</sup>, Elena Ibanez<sup>c</sup>, Antonello Merlino<sup>a</sup>, Daria Maria Monti<sup>a\*</sup>

<sup>a</sup> Department of Chemical Sciences, University of Naples Federico II, via Cinthia 4, 80126, Naples, Italy.

<sup>b</sup> Department of Sciences and Technologies (DST), University of Sannio, 82100 Benevento, Italy.

<sup>c</sup> Laboratory of Foodomics, Institute of Food Science Research, CIAL, CSIC, Nicolás Cabrera 9, 28049 Madrid, Spain.

\*corresponding author: [mdmonti@unina.it](mailto:mdmonti@unina.it)

## Table of contents:

Number of pages: 7

Number of Tables: 2

Number of Figures: 3

Table S1. Data collection and refinement statistics.

Figure S1. PE crystals.

Figure S2. PE extraction and purification.

Figure S3. Analyses of PE dissolved crystals.

Table S2. Carotenoids peaks identification

**Table S1. Data collection and refinement statistics.**

| <b><i>Data collection</i></b>         |                          |
|---------------------------------------|--------------------------|
| Space group                           | R3                       |
| a=b, c (Å)                            | 186.590, 59.190          |
| $\alpha=\beta, \gamma$ (°)            | 90.0, 120.0              |
| Molecules for asymmetric unit         | Two $\alpha\beta$ dimers |
| Observed reflections                  | 925709 (44973)           |
| Unique reflections                    | 100909 (5012)            |
| Resolution (Å)                        | 46.65– 1.60 (1.62– 1.60) |
| Completeness (%)                      | 99.0 (98.3)              |
| Rmerge (%)                            | 0.101 (1.028)            |
| Average I/ $\sigma$ (I)               | 12.9 (2.2)               |
| Multiplicity                          | 9.2 (9.0)                |
| CC <sub>1/2</sub>                     | 0.997 (0.595)            |
| <b><i>Refinement</i></b>              |                          |
| Resolution (Å)                        | 46.65 -1.60              |
| N° reflections                        | 95441                    |
| N° reflections in working set         | 6986                     |
| Rfactor/Rfree                         | 0.223/0.256              |
| N° non-H atoms in the refinement      | 5990                     |
| B-factor overall (Å <sup>2</sup> )    | 18.1                     |
| Average B-factor                      | 23.93                    |
| <b><i>Ramachandran values (%)</i></b> |                          |
| Most favoured/ Additional allowed     | 97.19                    |
| Outliers                              | 0.62                     |
| <b><i>R.m.s.d. from ideality</i></b>  |                          |
| R.m.s.d. bonds (Å)                    | 0.010                    |
| R.m.s.d. angles (°)                   | 1.602                    |

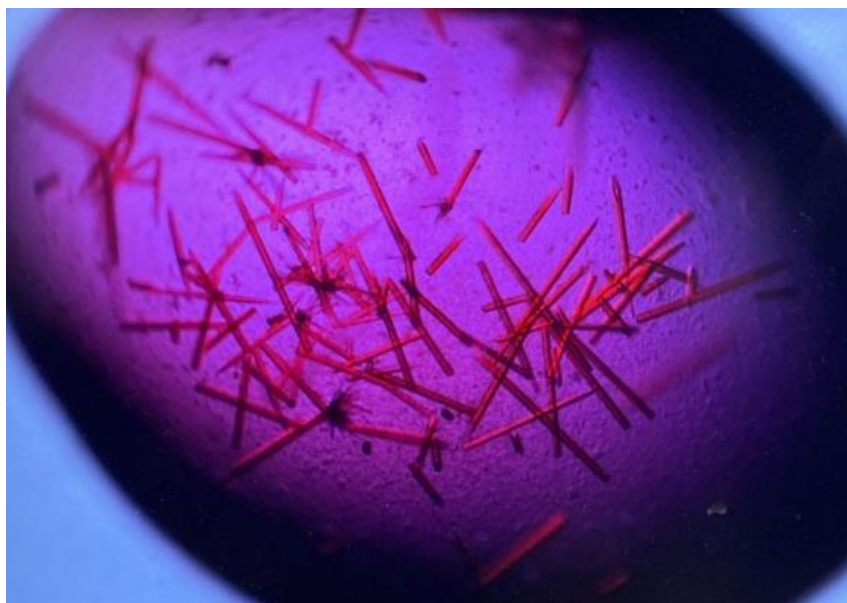

**Figure S1. PE crystals.** Crystals were grown by hanging drop vapor diffusion method using a drop containing 10 mg/mL PE in 0.250 M ammonium sulphate, 0.025 M potassium phosphate at pH 5.0, equilibrated with a reservoir containing 0.500 M ammonium sulphate, 0.050 M potassium phosphate at pH 5.0.

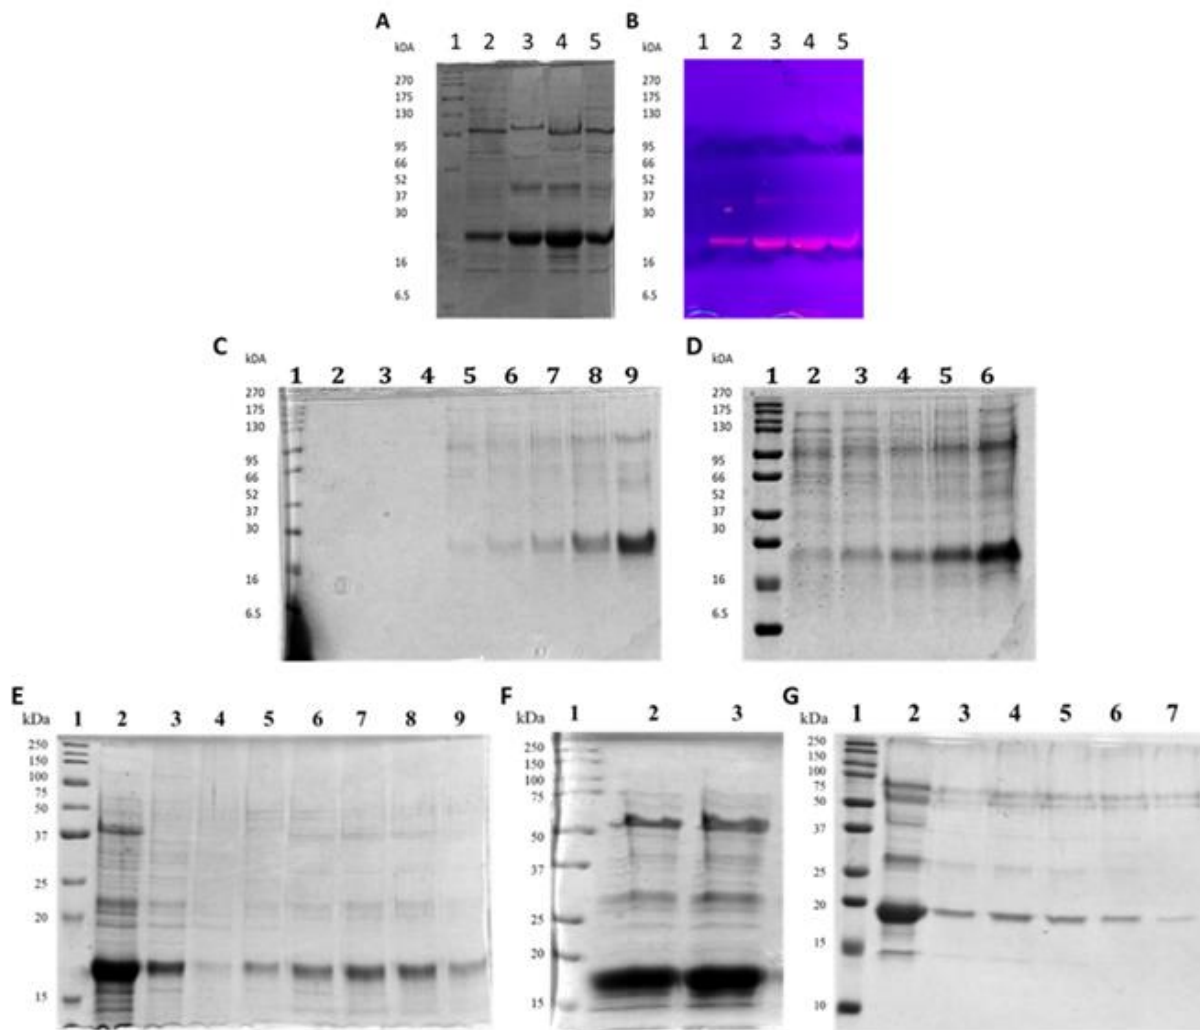

**Figure S2. PE extraction and purification.** Coomassie stained (A) and UVA light exposed unstained (B) SDS-PAGE analysis of total proteins extracted with different techniques. Lane 1: protein molecular weight markers; lane 2: Freeze & thaw extract; lane 3: Ultrasound extract; lane 4: Maceration extract; lane 5: French Press extract. 30  $\mu\text{g}$  of total proteins were loaded in each lane. C, D, Coomassie staining of SDS-PAGE. Proteins were extracted by ultrasounds for different times. (C) fresh biomass and (D) frozen biomass. C: Lane 1: protein molecular weight markers; lanes 2-4: empty lanes; lanes 5-9: proteins extracted for 4, 8, 12, 16, and 20 minutes, respectively. D: Lane 1: protein molecular weight markers; lanes 2-6: proteins extracted for 4, 8, 12, 16, and 20 minutes, respectively. E-G. SDS-PAGE analysis of different procedures to isolate PE from *P. cruentum*. E: Anion-exchange. Lane 1: molecular weight markers; lane 2: total protein extract, lane 3: unbound; lane 4: washing fraction 1; lane 5: washing fraction 3; lane 6-9: samples eluted by 0.25 M NaCl. F: Ultrafiltration. Lane 1: molecular weight markers; lane 2: total protein extract; lane 3: ultrafiltration retentate. G: Size exclusion chromatography. Lane 1: molecular weight markers; lane 2: total protein extract; lanes 3-7: samples eluted from gel filtration. In all lanes, 30  $\mu\text{g}$  of total proteins were analyzed.

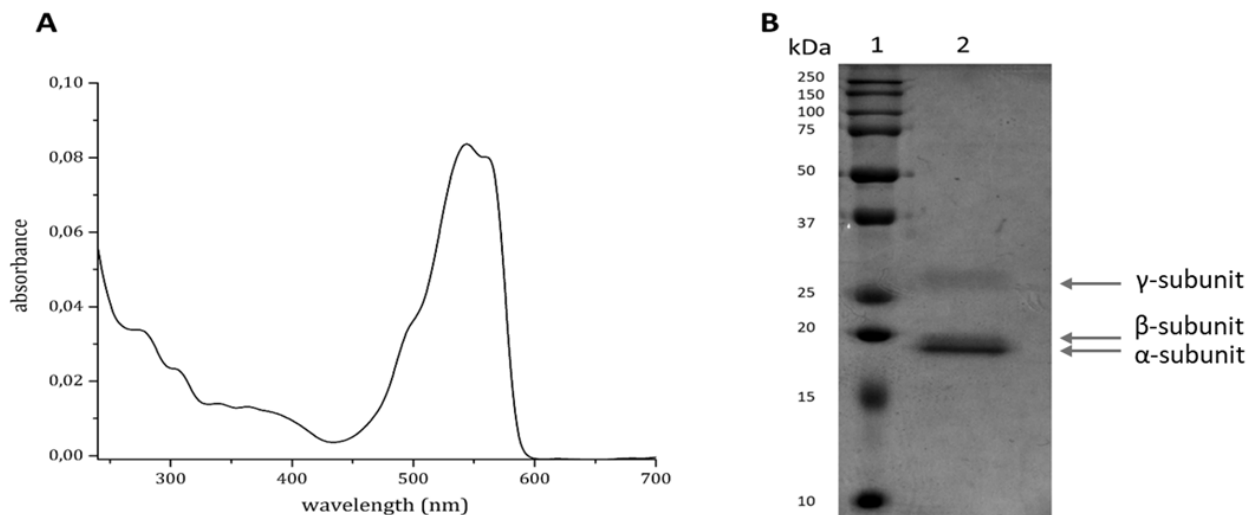

**Figure S3. Analyses of PE dissolved crystals.** **A:** UV-vis spectrum obtained from PE dissolved crystals. Spectrum was acquired at 25 °C, in the range 400–700 nm. **B:** SDS-PAGE analyses of PE dissolved crystals. Lane 1: molecular weight markers; lane 2: 20  $\mu$ L of PE dissolved crystals.

**Table S2.** Tentatively identified compounds from *P. cruentum* extracts by HPLC-DAD-APCI-QTOF-MS/MS analysis, including peak annotation, high-resolution mass spectrometry features and UV–Vis maxima.

| Peak | RT (min) | Identification               | Experimental $[M + H]^+$ $m/z$ | UV–Vis maxima (nm) | MS/MS product ions           |
|------|----------|------------------------------|--------------------------------|--------------------|------------------------------|
| 1    | 3.471    | Chlorophyll derivative I     | 549.4875                       | 340s, 380s, 428    | 307.1400, 97.1048            |
| 2    | 4.177    | Chlorophyll derivative II    | 549.4871                       | 340s, 380s, 428    | 305.1354, 255.0720           |
| 3    | 6.658    | Phaeophorbid B, methyl ester | 623.2851                       | 420                | 565.2795, 499.2056           |
| 4    | 7.347    | Pheophytin derivative        | 909.5374                       | 340s, 380s, 428    | 631.2374, 559.2071           |
| 5    | 7.668    | Zeaxanthin isomer I          | 569.4357                       | 422, 446, 474      | 464.8067, 281.2215, 175.1480 |
| 6    | 8.057    | Zeaxanthin                   | 569.4342                       | 420s, 445, 476     | 423.3309, 338.2549, 175.1480 |
| 7    | 9.826    | Zeaxanthin isomer II         | 569.4365                       | 422, 446, 474      | 539.4249, 175.1480           |
| 8    | 11.920   | 3-Acetylpheophytin a         | 887.5709                       | 410                | 609.2687, 549.2495           |
| 9    | 13.621   | Divinyl pheophytin a         | 869.5547                       | 410                | 592.2652, 487.1950           |
| 10   | 14.656   | Plastoquinone                | 749.6235                       | 420                | 551.3212, 495.2654, 151.0743 |
| 11   | 14.862   | Pheophytin b                 | 885.5527                       | 420                | 607.2536, 503.2403           |
| 12   | 16.500   | Pheophytin a                 | 871.5739                       | 420                | 594.2828, 533.2567           |
| 13   | 18.701   | $\beta$ -Carotene            | 537.4441                       | 420s, 450, 480     | 375.2935, 173.1293           |
| 14   | 18.892   | $\beta$ -Carotene isomer     | 537.4456                       | 420s, 450, 480     | 261.1637, 146.1004           |
